# Supplementary figures and images for: Uncovering temporal structure in hippocampal output patterns
Source: eLife journal article supplement (doi:10.7554/elife.34467), 2018-06-04

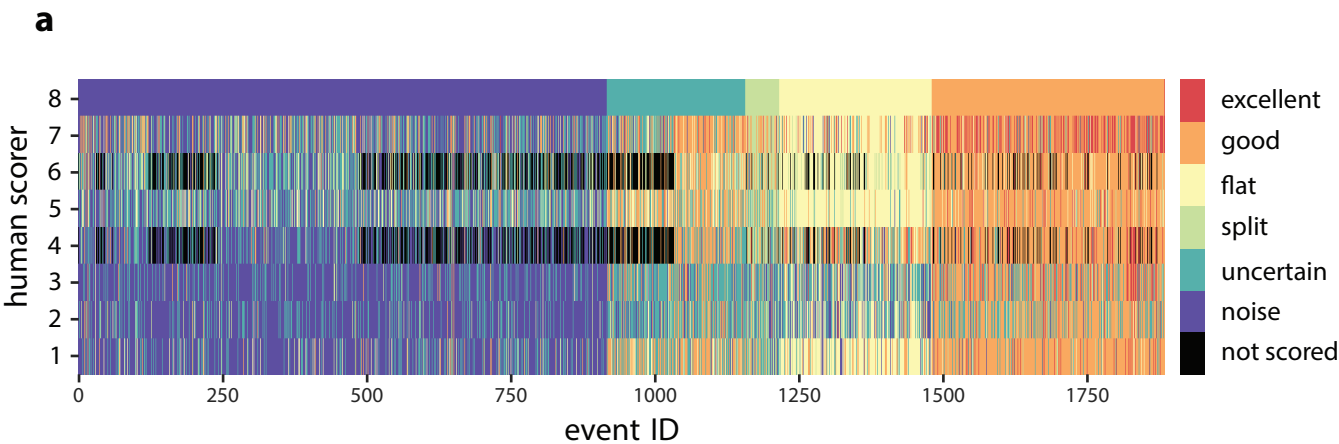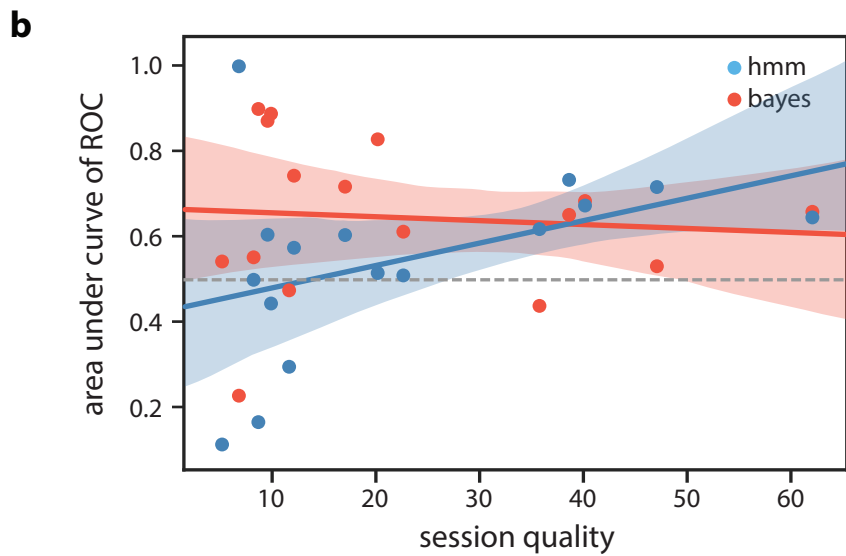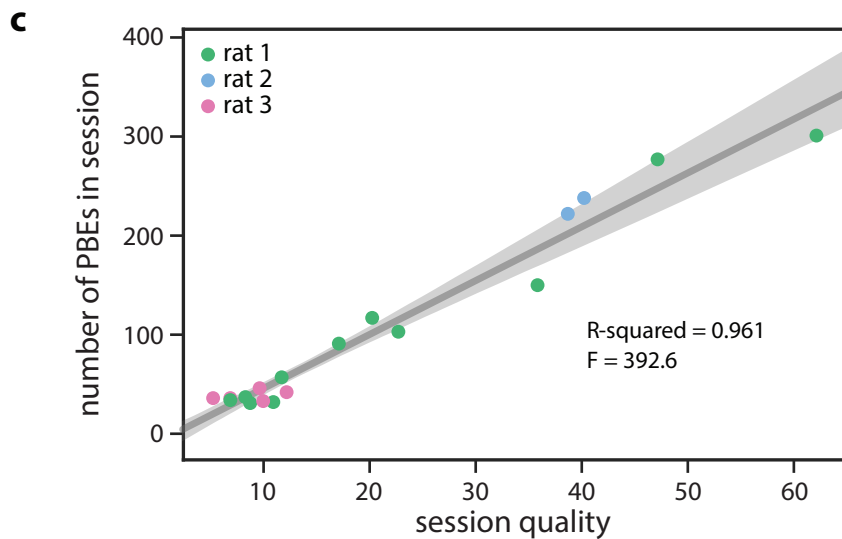

Supplement: supp [file elife-34467-supp-v1.zip]

**a**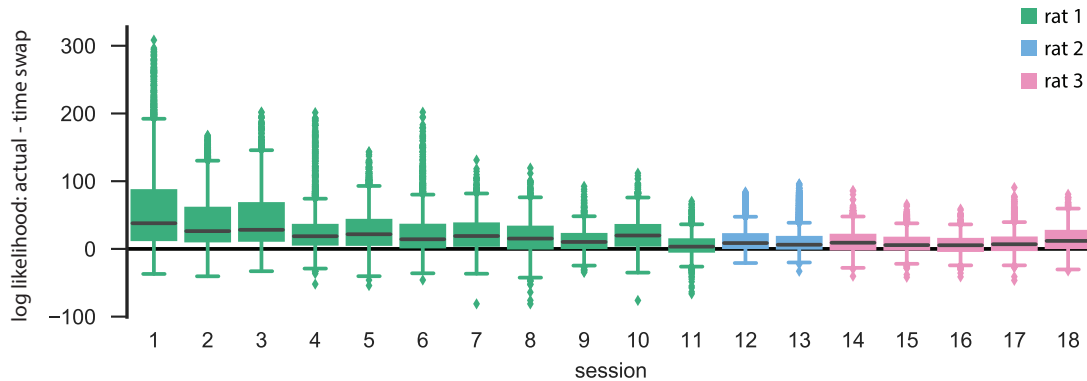**b**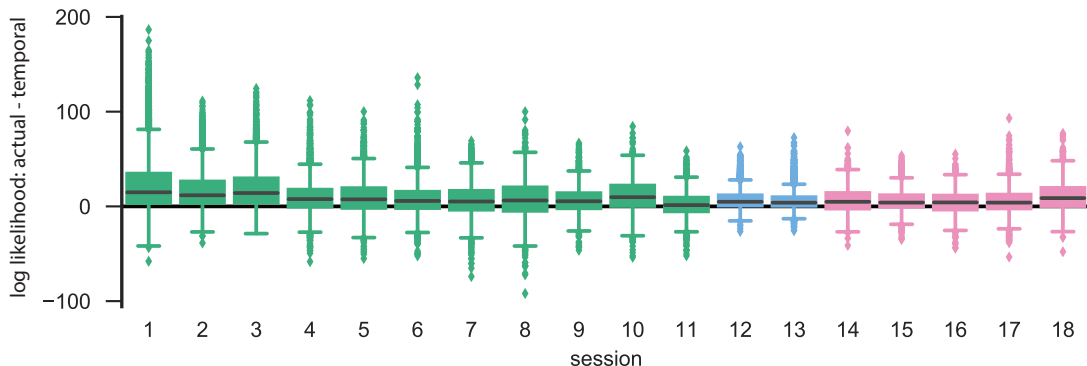

Supplement: supp [file elife-34467-supp-v1.zip]

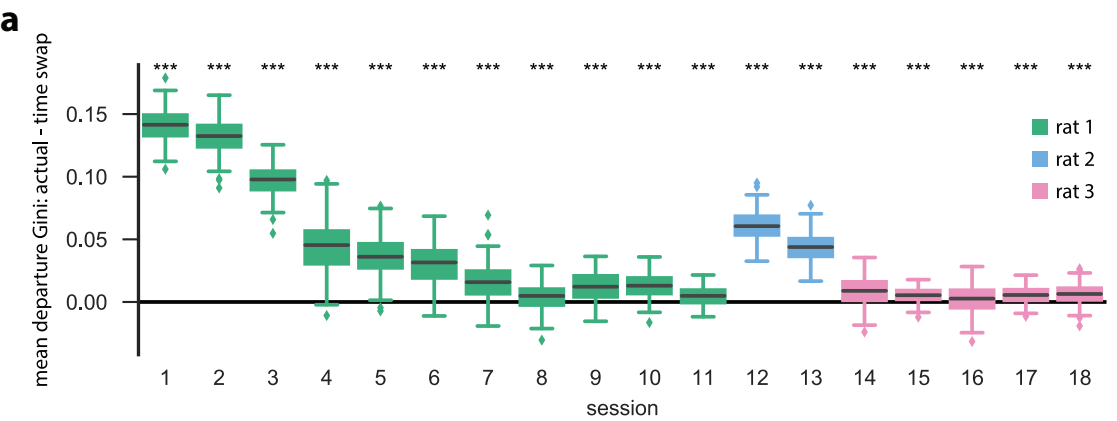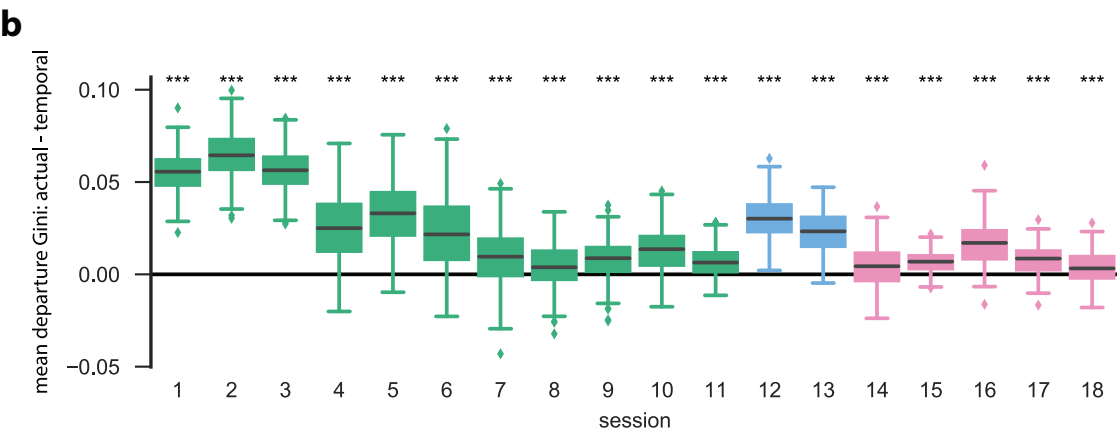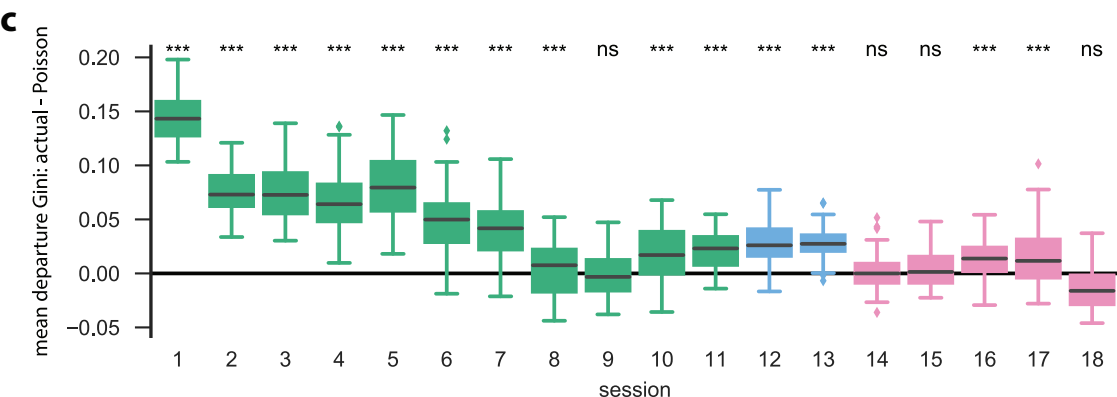

Supplement: supp [file elife-34467-supp-v1.zip]

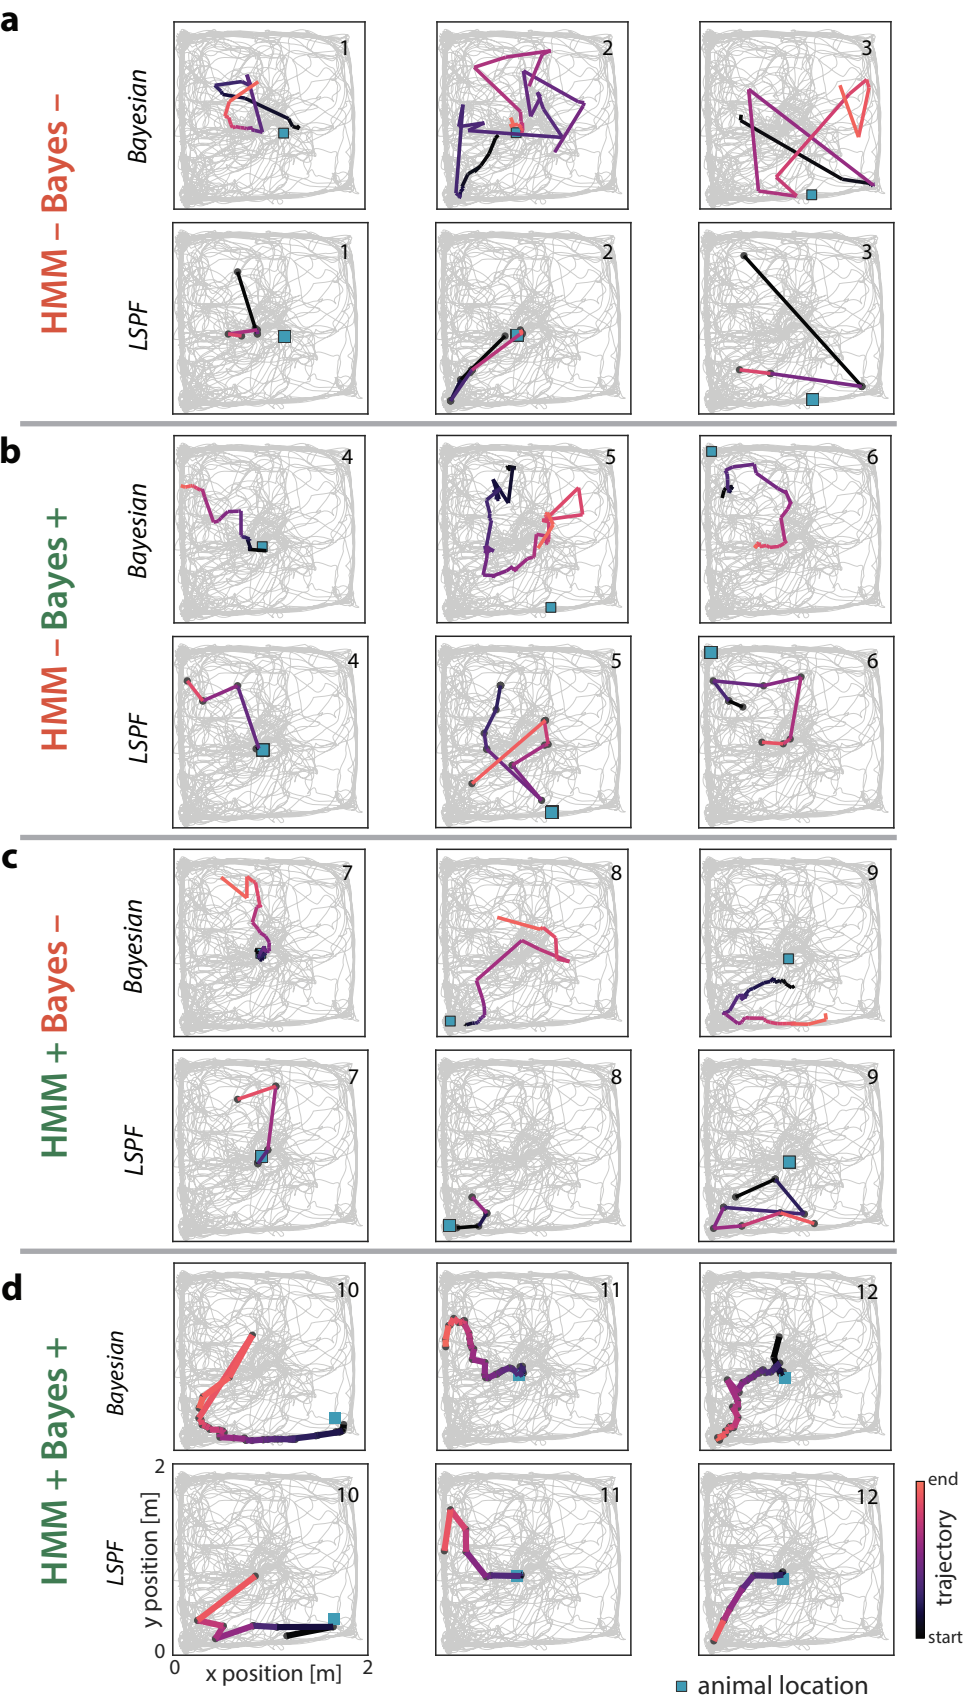

Supplement: supp [file elife-34467-supp-v1.zip]

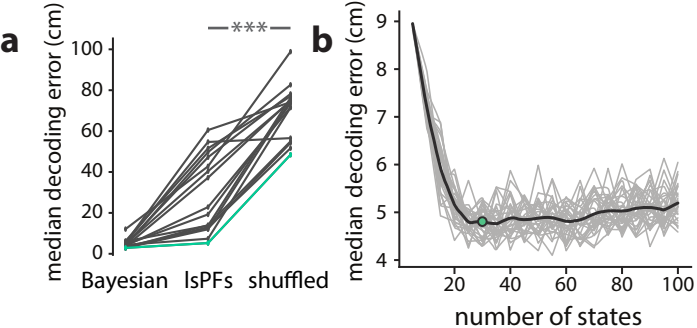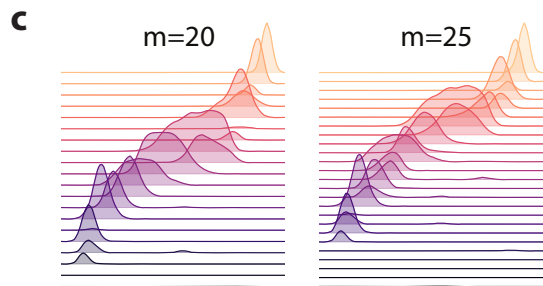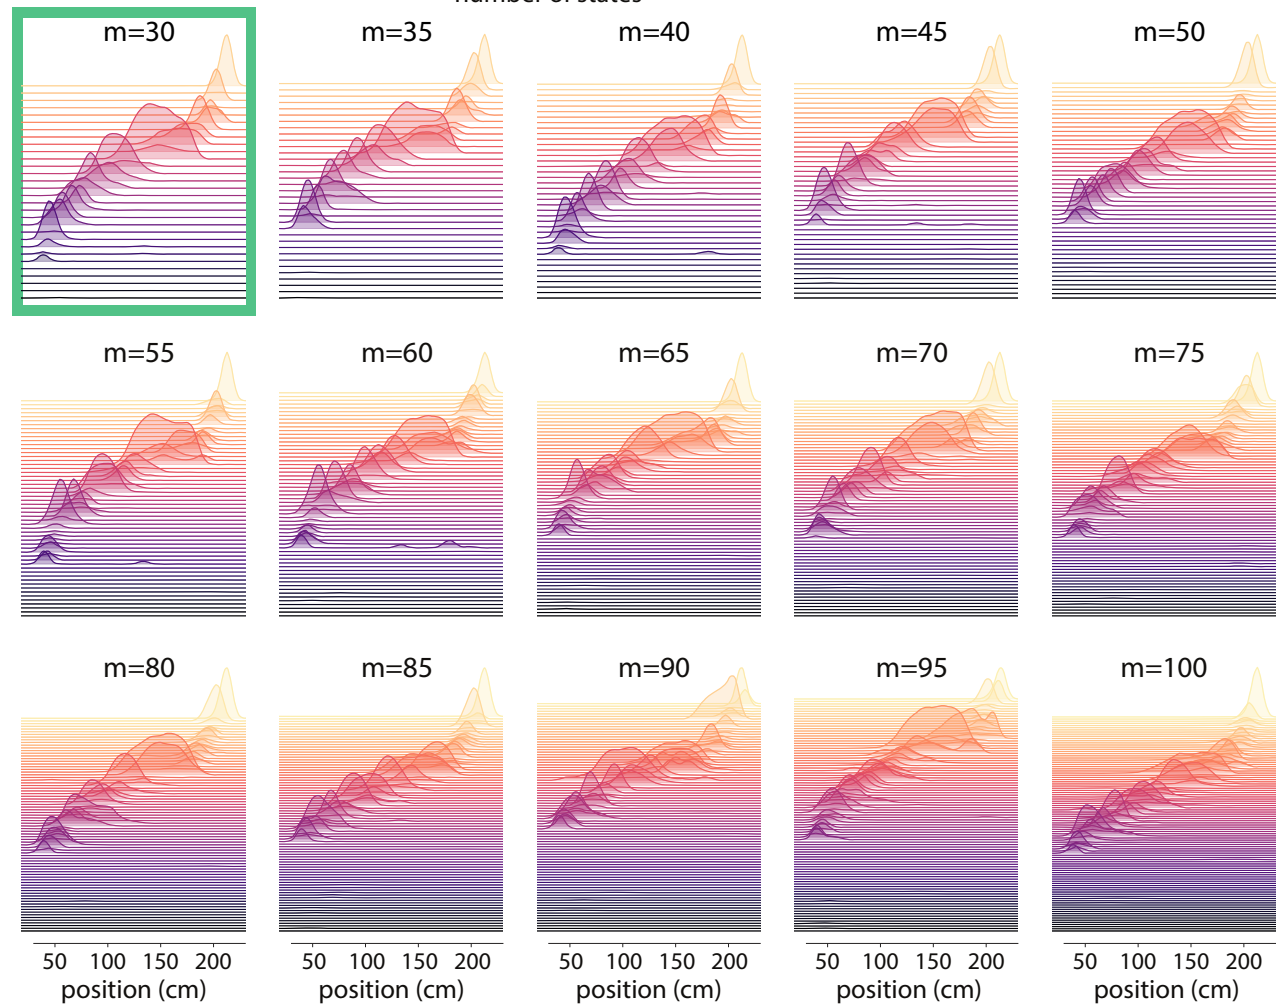

Supplement: supp [file elife-34467-supp-v1.zip]

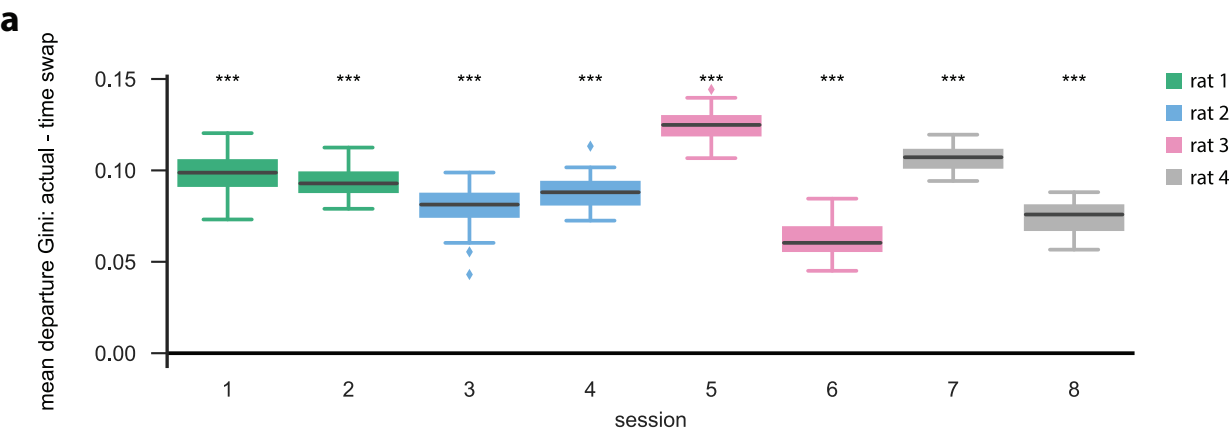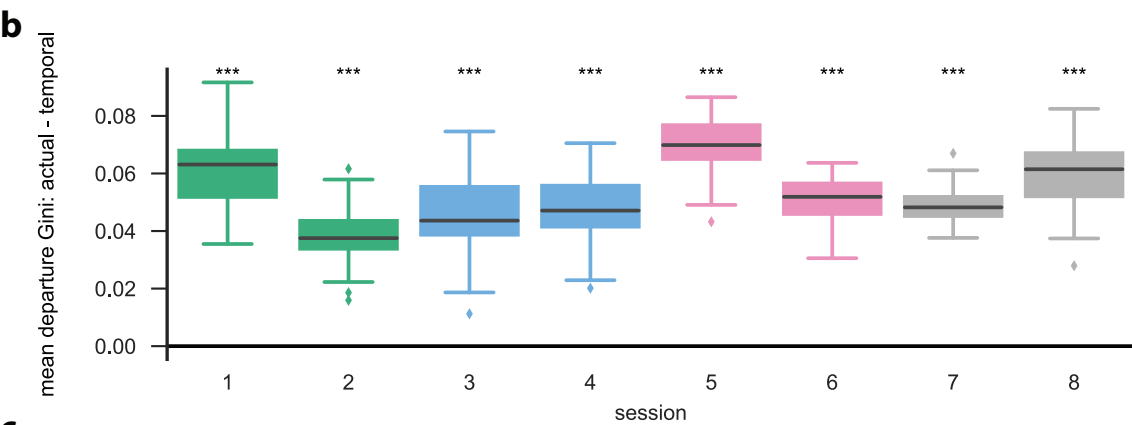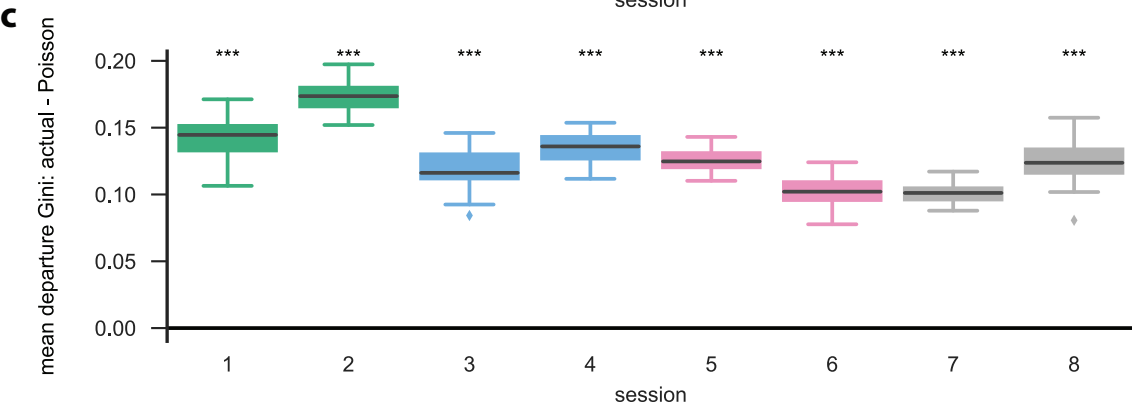

Supplement: supp [file elife-34467-supp-v1.zip]

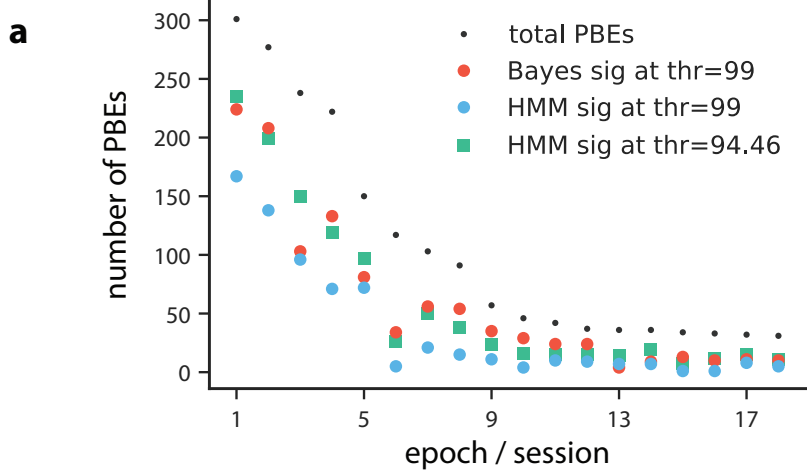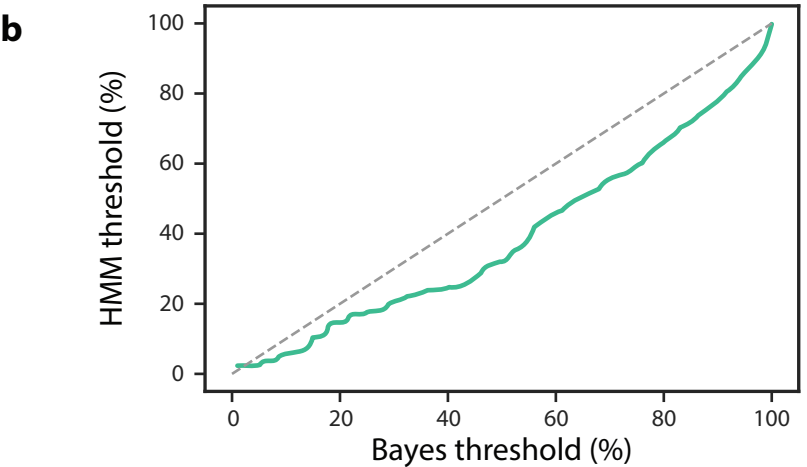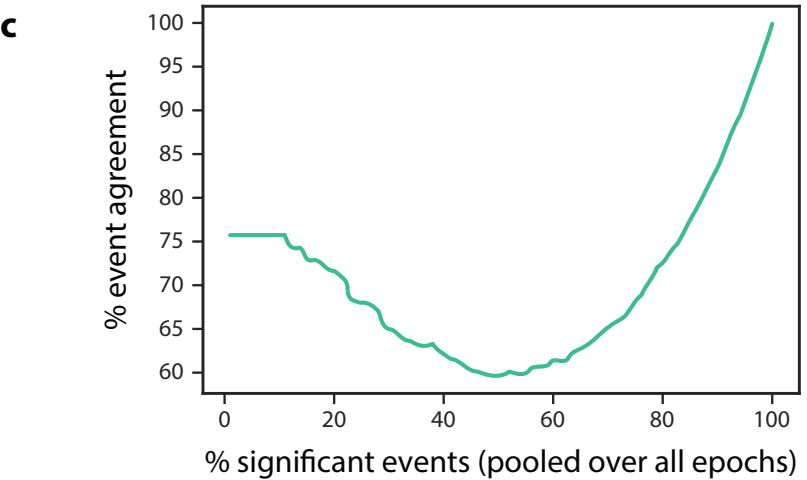

Supplement: supp [file elife-34467-supp-v1.zip]

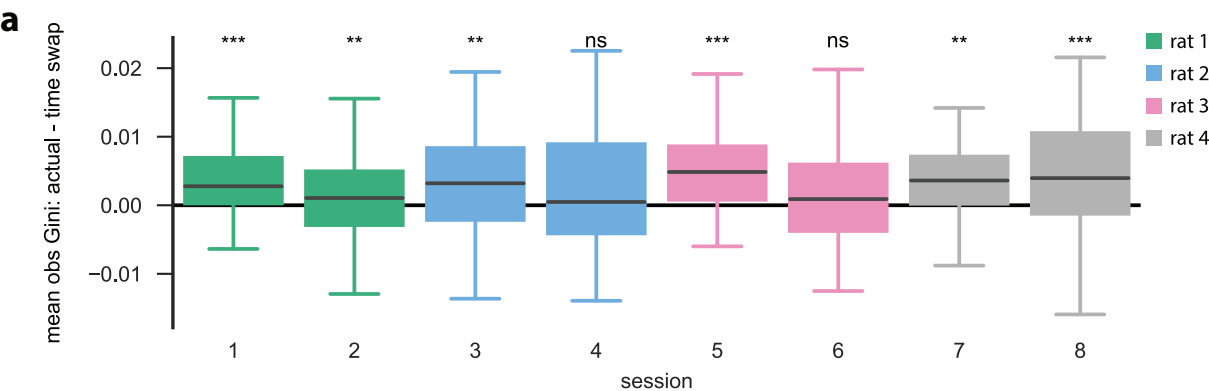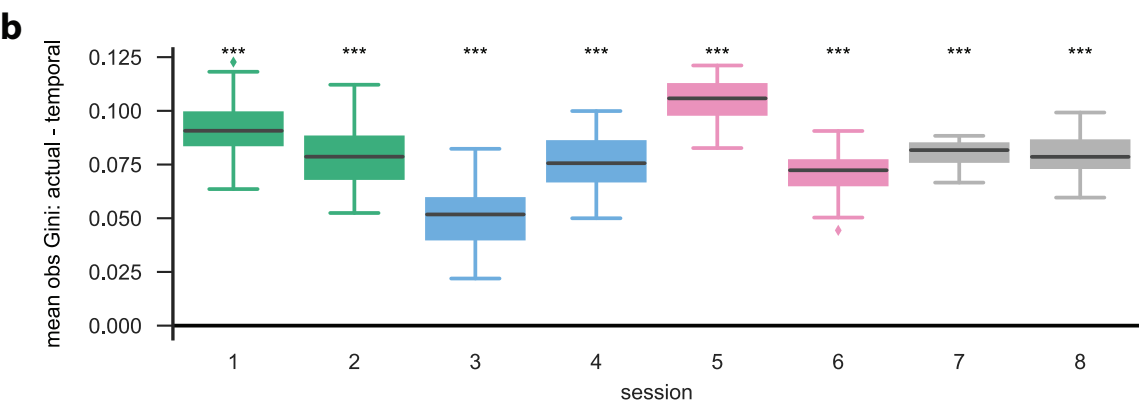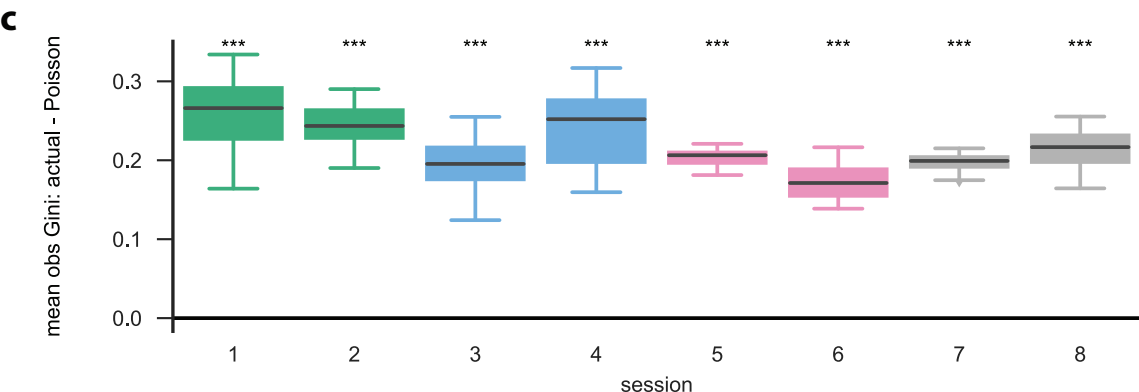

Supplement: supp [file elife-34467-supp-v1.zip]

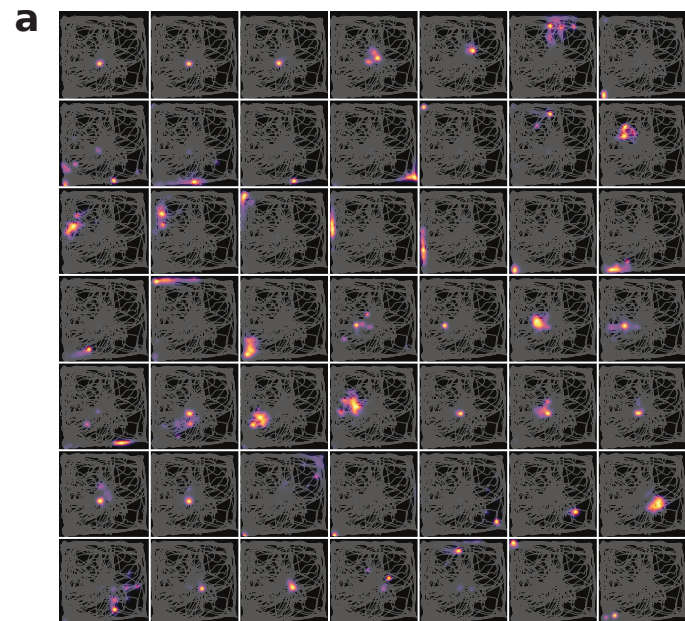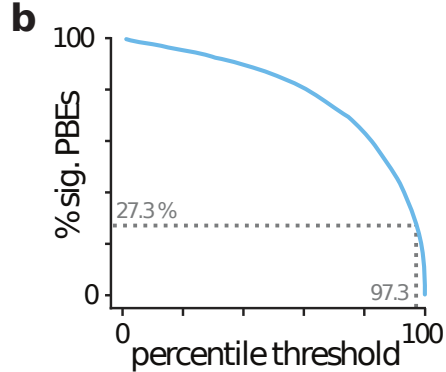

|     |   | Bayesian |      |      |
|-----|---|----------|------|------|
|     |   | +        | -    |      |
| HMM | + | 257      | 556  | 815  |
|     | - | 556      | 1609 | 2165 |
|     |   | 815      | 2165 | 2980 |

62.7% agreement;  $p < 0.01$

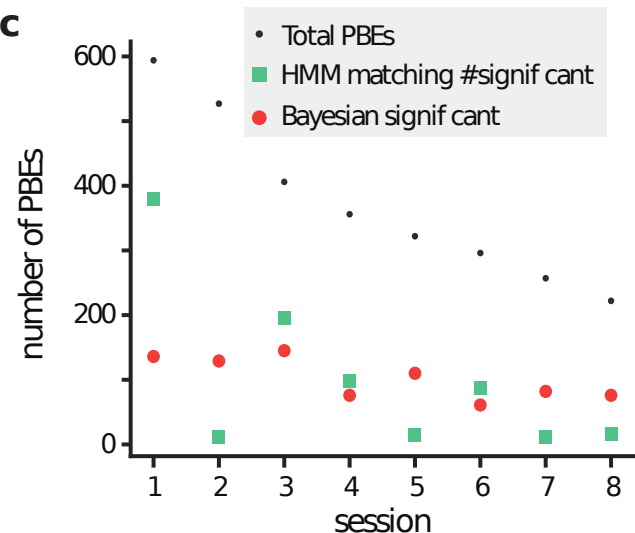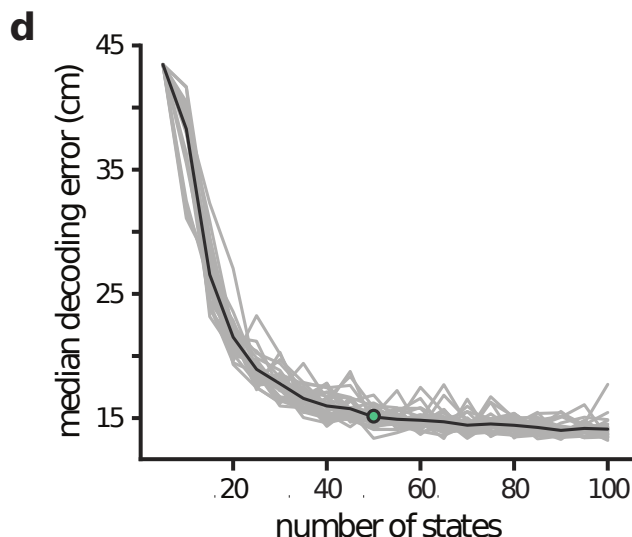

Supplement: supp [file elife-34467-supp-v1.zip]

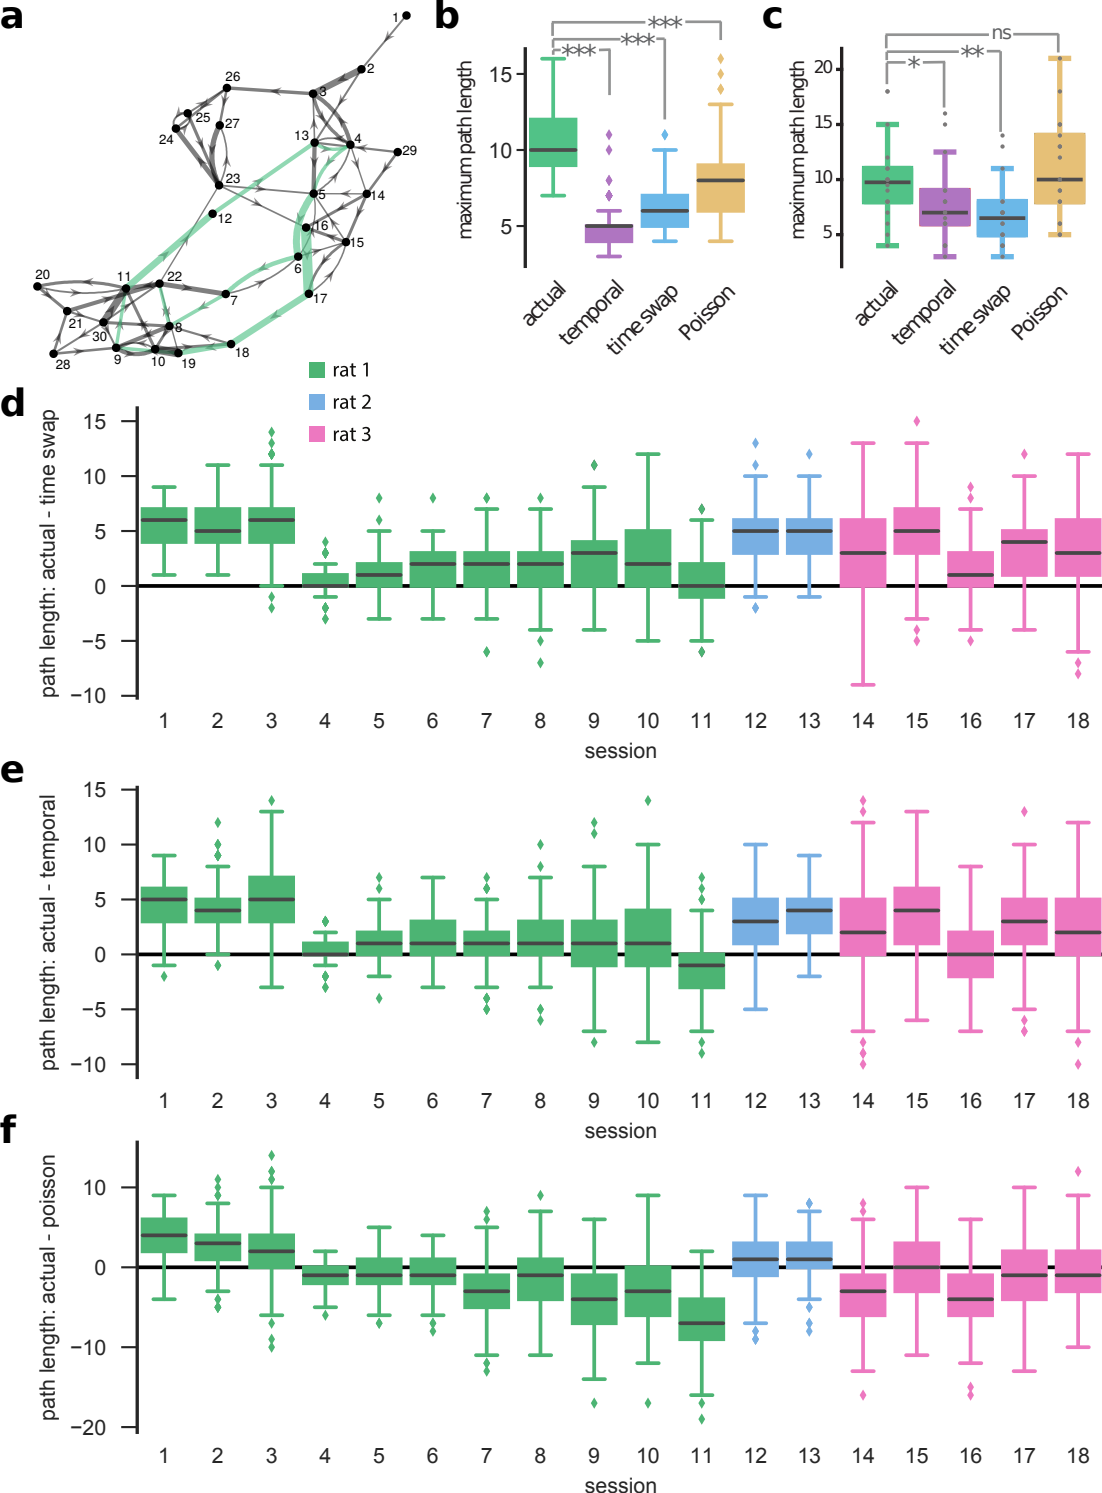

Supplement: supp [file elife-34467-supp-v1.zip]

**a**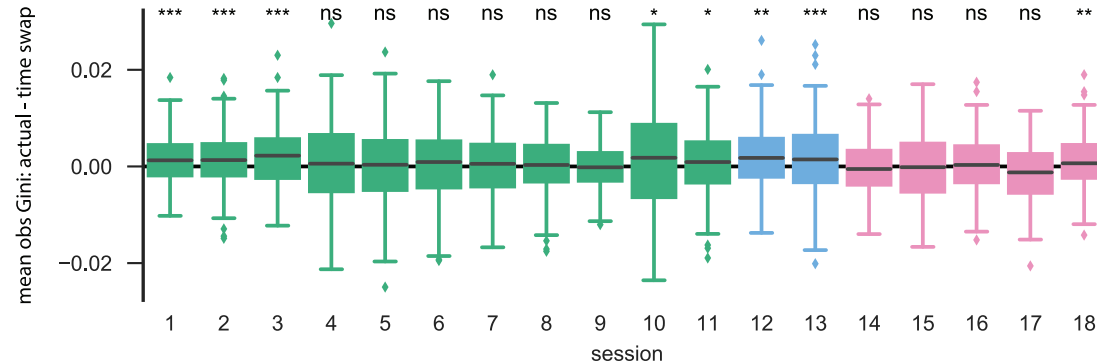**b**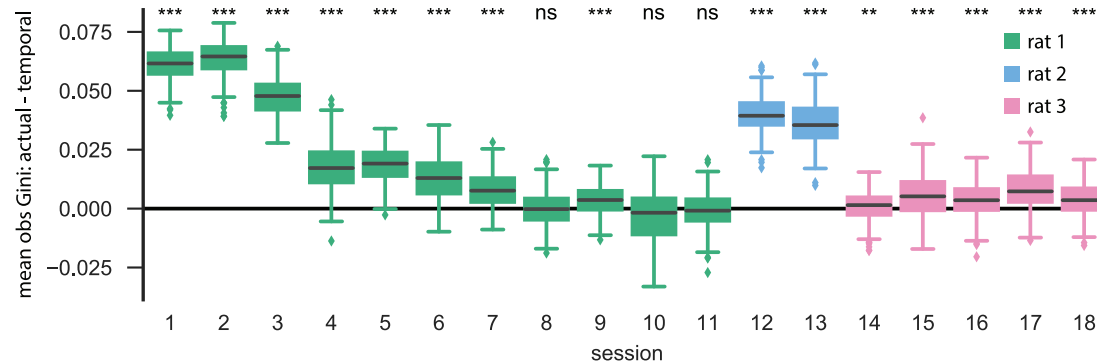**c**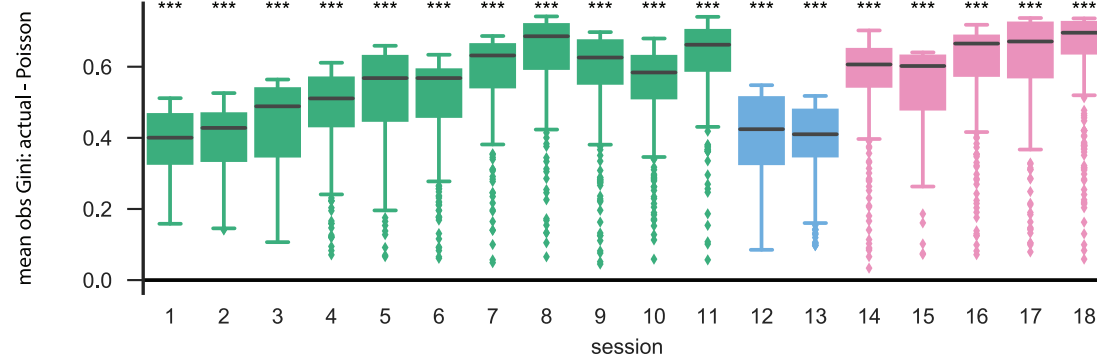

Supplement: supp [file elife-34467-supp-v1.zip]
